# Supplementary material for: Psychotropic use for behavioral and psychological symptoms of dementia during the COVID-19 pandemic: a systematic review and meta-analysis
Source: PubMed Central journal article supplement — BMC Geriatr. 2024 Nov 21;24:967. doi: 10.1186/s12877-024-05563-4 (PMC11580495; doi:10.1186/s12877-024-05563-4), 2024-11-21
Supplement: 12877_2024_5563_MOESM1_ESM.pdf [file 12877_2024_5563_MOESM1_ESM.pdf]

## Additional file 1. Search strategies

| Database | No  | Search strategy                                                                                                                                                                                                                              | Results |
|----------|-----|----------------------------------------------------------------------------------------------------------------------------------------------------------------------------------------------------------------------------------------------|---------|
| Embase * | #1  | ('dementia'/exp OR 'dementia*':ab,ti OR 'Alzheimer*':ab,ti)                                                                                                                                                                                  | 84,201  |
|          | #2  | ('coronavirus disease 2019'/exp OR 'pandemic'/exp OR 'COVID*':ti,ab OR 'SARS-CoV-2':ti,ab OR 'pandemic*':ti,ab OR 'corona*':ti,ab)                                                                                                           | 498,255 |
|          | #3  | ('psychotropic agent'/exp OR 'psychotropic*':ti,ab OR 'antipsychotic*':ti,ab OR 'anti-psychotic*':ti,ab OR 'psychoactive*':ti,ab OR 'tranquil*':ti,ab OR 'neuroleptic*':ti,ab)                                                               | 27,323  |
|          | #4  | ('antianxi*':ti,ab OR 'anti-anxi*':ti,ab OR 'anxiolytic*':ti,ab)                                                                                                                                                                             | 3,537   |
|          | #5  | ('hypnotic sedative agent'/exp OR 'hypnotic*':ti,ab OR 'sedative*':ti,ab)                                                                                                                                                                    | 7,335   |
|          | #6  | ('benzodiazepine derivative'/exp OR 'benzodiazepine*':ti,ab)                                                                                                                                                                                 | 8,227   |
|          | #7  | ('antidepress*':ti,ab OR 'anti-depress*':ti,ab OR 'mood stabili*':ti,ab)                                                                                                                                                                     | 15,995  |
|          | #8  | ('anticonvulsive agent'/exp OR 'anticonvulsant*':ti,ab OR 'anti-convulsant*':ti,ab OR 'antiepileptic*':ti,ab OR 'anti-epileptic*':ti,ab)                                                                                                     | 10,023  |
|          | #9  | ('cholinesterase inhibitor'/exp OR 'cholinesterase*':ti,ab OR 'anticholinesterase*':ti,ab OR 'anti-cholinesterase*':ti,ab OR 'acetylcholinesterase*':ti,ab OR 'memantine*':ti,ab)                                                            | 8,850   |
|          | #10 | ('behavio*':ti,ab OR 'psycho*':ti,ab OR 'psychiatric*':ti,ab OR 'neuropsychiatric*':ti,ab OR 'disturbance*':ti,ab OR 'BPSD':ti,ab OR 'NPS':ti,ab)                                                                                            | 653,202 |
|          | #11 | #3 OR #4 OR #5 OR #6 OR #7 OR #8 OR #9 OR #10                                                                                                                                                                                                | 691,056 |
|          | #12 | #1 AND #2 AND #11                                                                                                                                                                                                                            | 762     |
| PubMed † | #1  | ("Dementia"[Mesh] OR "dementia*"[Title/Abstract] OR "Alzheimer*"[Title/Abstract])                                                                                                                                                            | 126,733 |
|          | #2  | ("COVID-19"[Mesh] OR "SARS-CoV-2"[Mesh] OR "Pandemics"[Mesh] OR "COVID*"[Title/Abstract] OR "SARS-CoV-2"[Title/Abstract] OR "pandemic*"[Title/Abstract] OR "corona*"[Title/Abstract])                                                        | 614,354 |
|          | #3  | ("Psychotropic Drugs"[Mesh] OR "psychotropic*"[Title/Abstract] OR "antipsychotic*"[Title/Abstract] OR "anti-psychotic*"[Title/Abstract] OR "psychoactive*"[Title/Abstract] OR "tranquil*"[Title/Abstract] OR "neuroleptic*"[Title/Abstract]) | 196,463 |
|          | #4  | ("antianxi*"[Title/Abstract] OR "anti-anxi*"[Title/Abstract] OR "anxiolytic*"[Title/Abstract])                                                                                                                                               | 4,524   |
|          | #5  | ("Hypnotics and Sedatives"[Mesh] OR "hypnotic*"[Title/Abstract] OR "sedative*"[Title/Abstract])                                                                                                                                              | 97,784  |
|          | #6  | ("Benzodiazepines"[Mesh] OR "benzodiazepine*"[Title/Abstract])                                                                                                                                                                               | 50,514  |
|          | #7  | ("antidepress*"[Title/Abstract] OR "anti-depress*"[Title/Abstract] OR "mood stabili*"[Title/Abstract])                                                                                                                                       | 20,763  |
|          | #8  | ("Anticonvulsants"[Mesh] OR "anticonvulsant*"[Title/Abstract] OR "anti-convulsant*"[Title/Abstract] OR "antiepileptic*"[Title/Abstract] OR "anti-epileptic*"[Title/Abstract])                                                                | 88,752  |
|          | #9  | ("Cholinesterase Inhibitors"[Mesh] OR "cholinesterase*"[Title/Abstract] OR "anticholinesterase*"[Title/Abstract] OR "anti-cholinesterase*"[Title/Abstract] OR "acetylcholinesterase*"[Title/Abstract] OR "memantine*"[Title/Abstract])       | 19,907  |
|          | #10 | ("behavio*"[Title/Abstract] OR "psycho*"[Title/Abstract] OR "psychiatric*"[Title/Abstract] OR "neuropsychiatric*"[Title/Abstract] OR "disturbance*"[Title/Abstract] OR "BPSD"[Title/Abstract] OR "NPS"[Title/Abstract])                      | 707,504 |
|          | #11 | #3 OR #4 OR #5 OR #6 OR #7 OR #8 OR #9 OR #10                                                                                                                                                                                                | 929,067 |
|          | #12 | #1 AND #2 AND #11                                                                                                                                                                                                                            | 1,837   |

Additional file 1. Search strategies (continued)

| Database   | No  | Search strategy                                                                                                                                                                                                                                                                                    | Results |
|------------|-----|----------------------------------------------------------------------------------------------------------------------------------------------------------------------------------------------------------------------------------------------------------------------------------------------------|---------|
| PsycINFO ‡ | S1  | subject("Dementia") OR tiab("dementia*" OR "Alzheimer*")                                                                                                                                                                                                                                           | 22,267  |
|            | S2  | subject("COVID-19" OR "Pandemics") OR tiab("COVID*" OR "SARS-CoV-2" OR "pandemic*" OR "corona*")                                                                                                                                                                                                   | 46,549  |
|            | S3  | subject("Psychotropic Drugs") OR tiab("psychotropic*" OR "antipsychotic*" OR "anti-psychotic*" OR "psychoactive*" OR "tranquil*" OR "neuroleptic*")                                                                                                                                                | 6,555   |
|            | S4  | tiab("antianxi*" OR "anti-anxi*" OR "anxiolytic*")                                                                                                                                                                                                                                                 | 970     |
|            | S5  | subject("Hypnotic Drugs" OR "Sedatives") OR tiab("hypnotic*" OR "sedative*")                                                                                                                                                                                                                       | 1,376   |
|            | S6  | subject("Benzodiazepines") OR tiab("benzodiazepine*")                                                                                                                                                                                                                                              | 1,427   |
|            | S7  | tiab("antidepress*" OR "anti-depress*" OR "mood stabili*")                                                                                                                                                                                                                                         | 5,445   |
|            | S8  | subject("Anticonvulsive Drugs") OR tiab("anticonvulsant*" OR "anti-convulsant*" OR "antiepileptic*" OR "anti-epileptic*")                                                                                                                                                                          | 1,270   |
|            | S9  | subject("cholinesterase inhibitors") tiab("cholinesterase*" OR "anticholinesterase*" OR "anti-cholinesterase*" OR "acetylcholinesterase*" OR "memantine*")                                                                                                                                         | 110     |
|            | S10 | tiab("behavio*" OR "psycho*" OR "psychiatric*" OR "neuropsychiatric*" OR "disturbance*" OR "BPSD" OR "NPS")                                                                                                                                                                                        | 204,798 |
|            | S11 | [S3] OR [S4] OR [S5] OR [S6] OR [S7] OR [S8] OR [S9] OR [S10]                                                                                                                                                                                                                                      | 212,408 |
|            | S12 | [S1] AND [S2] AND [S11]                                                                                                                                                                                                                                                                            | 234     |
| CINAHL§    | S1  | MH "Dementia" OR TI "dementia*" AB "dementia*" OR TI "Alzheimer*" OR AB "Alzheimer*"                                                                                                                                                                                                               | 17,565  |
|            | S2  | MH "COVID-19" OR MH "COVID-19 Pandemic" OR TI "COVID*" OR TI "SARS-CoV-2" OR TI "pandemic*" OR TI "corona*" OR AB "COVID*" OR AB "SARS-CoV-2" OR AB "pandemic*" OR AB "corona*"                                                                                                                    | 179,391 |
|            | S3  | MH "Psychotropic Drugs" OR TI "psychotropic*" OR TI "antipsychotic*" OR TI "anti-psychotic*" OR TI "psychoactive*" OR TI "tranquil*" OR TI "neuroleptic*" OR AB "psychotropic*" OR AB "antipsychotic*" OR AB "anti-psychotic*" OR AB "psychoactive*" OR AB "tranquil*" OR AB "neuroleptic*"        | 5,415   |
|            | S4  | TI "antianxi*" OR TI "anti-anxi*" OR TI "anxiolytic*" OR AB "antianxi*" OR AB "anti-anxi*" OR AB "anxiolytic*"                                                                                                                                                                                     | 717     |
|            | S5  | MH "Hypnotics and Sedatives" OR TI "hypnotic*" OR TI "sedative*" OR AB "hypnotic*" OR AB "sedative*"                                                                                                                                                                                               | 2,211   |
|            | S6  | MH "Benzodiazepines" OR TI "benzodiazepine*" OR AB "benzodiazepine*"                                                                                                                                                                                                                               | 1,854   |
|            | S7  | TI "antidepress*" OR TI "anti-depress*" OR TI "mood stabili*" OR AB "antidepress*" OR AB "anti-depress*" OR AB "mood stabili*"                                                                                                                                                                     | 3,658   |
|            | S8  | MH "Anticonvulsants" OR TI "anticonvulsant*" OR TI "anti-convulsant*" OR TI "antiepileptic*" OR TI "anti-epileptic*" OR AB "anticonvulsant*" OR AB "anti-convulsant*" OR AB "antiepileptic*" OR AB "anti-epileptic*"                                                                               | 2,087   |
|            | S9  | MH "Cholinesterase Inhibitors" OR TI "cholinesterase*" OR TI "anticholinesterase*" OR TI "anti-cholinesterase*" OR TI "acetylcholinesterase*" OR TI "memantine*" OR AB "cholinesterase*" OR AB "anticholinesterase*" OR AB "anti-cholinesterase*" OR AB "acetylcholinesterase*" OR AB "memantine*" | 973     |
|            | S10 | TI "behavio*" OR TI "psycho*" OR TI "psychiatric*" OR TI "neuropsychiatric*" OR TI "disturbance*" OR TI "BPSD" OR TI "NPS" OR AB "behavio*" OR AB "psycho*" OR AB "psychiatric*" OR AB "neuropsychiatric*" OR AB "disturbance*" OR AB "BPSD" OR AB "NPS"                                           | 176,496 |

## Additional file 1. Search strategies (continued)

| Database                       | No  | Search strategy                                                                                                                                                | Results |
|--------------------------------|-----|----------------------------------------------------------------------------------------------------------------------------------------------------------------|---------|
| CINAHL <sup>§</sup>            | S11 | S3 OR S4 OR S5 OR S6 OR S7 OR S8 OR S9 OR S10                                                                                                                  | 185,136 |
| (continued)                    | S12 | S1 AND S2 AND S11                                                                                                                                              | 108     |
| Cochrane Library <sup>  </sup> | #1  | [mh "dementia"] OR ((dementia*) OR (Alzheimer*)):ti,ab,kw                                                                                                      | 7,868   |
|                                | #2  | [mh "COVID-19"] OR [mh "SARS-Cov-2"] OR [mh "Pandemics"] OR ((COVID*) OR (SARS-Cov-2) OR (pandemic*) OR (corona*)):ti,ab,kw                                    | 7,390   |
|                                | #3  | [mh "Psychotropic Drugs"] OR ((psychotropic*) OR (antipsychotic*) OR (anti-psychotic*) OR (psychoactive*) OR (tranquil*) OR (neuroleptic*)):ti,ab,kw           | 4,156   |
|                                | #4  | ((antianxi*) OR (anti-anxi*) OR (anxiolytic*)):ti,ab,kw                                                                                                        | 829     |
|                                | #5  | [mh "Hypnotics and Sedatives"] OR ((hypnotic*) OR (sedative*)):ti,ab,kw                                                                                        | 2,984   |
|                                | #6  | [mh "Benzodiazepines"] OR (benzodiazepine*):ti,ab,kw                                                                                                           | 1,828   |
|                                | #7  | ((antidepress*) OR (anti-depress*) OR (mood NEXT stabili*)):ti,ab,kw                                                                                           | 3,631   |
|                                | #8  | [mh "Anticonvulsants"] OR ((anticonvulsant*) OR (anti-convulsant*) OR (antiepileptic*) OR (anti-epileptic*)):ti,ab,kw                                          | 1,116   |
|                                | #9  | [mh "Cholinesterase Inhibitors"] OR ((cholinesterase*) OR (anticholinesterase*) OR (anti-cholinesterase*) OR (acetylcholinesterase*) OR (memantine*)):ti,ab,kw | 688     |
|                                | #10 | ((behavio*) OR (psycho*) OR (psychiatric*) OR (neuropsychiatric*) OR (disturbance*) OR (BPSD) OR (NPS)):ti,ab,kw                                               | 88,274  |
|                                | #11 | #3 OR #4 OR #5 OR #6 OR #7 OR #8 OR #9 OR #10                                                                                                                  | 95,137  |
|                                | #12 | #1 AND #2 AND #11                                                                                                                                              | 182     |

\* Filters: from 2020/1/1 - 2023/12/31

† Each query ends with “AND [2020-2023]/py”.

‡ Additional limits - Date: From January 01 2020 to December 31 2023

§ Limits - Publication data: 20200101-20231231

|| with Cochrane Library publication data from Jan 2020 to Dec 2023
