# Supplementary material for: Psychotropic use for behavioral and psychological symptoms of dementia during the COVID-19 pandemic: a systematic review and meta-analysis
Source: PubMed Central journal article supplement — BMC Geriatr. 2024 Nov 21;24:967. doi: 10.1186/s12877-024-05563-4 (PMC11580495; doi:10.1186/s12877-024-05563-4), 2024-11-21
Supplement: 12877_2024_5563_MOESM2_ESM.pdf [file 12877_2024_5563_MOESM2_ESM.pdf]

Additional file 2. Quality appraisal of included studies based on JBI (Joanna Briggs Institute)

Critical Appraisal tools<sup>27-29</sup>

| Author, year                                            | Q1  | Q2 | Q3 | Q4 | Q5 | Q6 | Q7 | Q8 | Q9  | Q10 | Q11 | JBI score |
|---------------------------------------------------------|-----|----|----|----|----|----|----|----|-----|-----|-----|-----------|
| <i>Prevalence studies</i> <sup>27</sup>                 |     |    |    |    |    |    |    |    |     |     |     |           |
| Coe et al., 2023 <sup>31</sup>                          | Y   | Y  | Y  | Y  | Y  | Y  | Y  | Y  | N/A | -   | -   | 8/8       |
| Ferro Uriguén et al., 2022 <sup>17</sup>                | N   | U  | U  | Y  | Y  | Y  | Y  | Y  | N/A | -   | -   | 5/8       |
| Harding et al., 2023 <sup>20</sup>                      | Y   | N  | U  | Y  | U  | U  | U  | N  | U   | -   | -   | 2/9       |
| Hoel et al., 2022 <sup>37</sup>                         | Y   | N  | U  | Y  | U  | U  | U  | N  | U   | -   | -   | 2/9       |
| Maxwell et al., 2024 <sup>26</sup>                      | Y   | Y  | Y  | Y  | Y  | Y  | Y  | Y  | N/A | -   | -   | 8/8       |
| <i>Analytical cross-sectional studies</i> <sup>28</sup> |     |    |    |    |    |    |    |    |     |     |     |           |
| Cohen et al., 2020 <sup>40</sup>                        | Y   | Y  | N  | U  | N  | N  | U  | Y  | -   | -   | -   | 3/8       |
| McDermid et al., 2023 <sup>34</sup>                     | Y   | Y  | N  | Y  | Y  | Y  | Y  | Y  | -   | -   | -   | 7/8       |
| Wang et al., 2023 <sup>36</sup>                         | Y   | Y  | Y  | Y  | Y  | Y  | Y  | Y  | -   | -   | -   | 8/8       |
| Yan et al., 2023 <sup>33</sup>                          | Y   | Y  | N  | Y  | Y  | Y  | Y  | Y  | -   | -   | -   | 7/8       |
| <i>Cohort studies</i> <sup>28</sup>                     |     |    |    |    |    |    |    |    |     |     |     |           |
| Harrison et al., 2021 <sup>41</sup>                     | N/A | Y  | Y  | Y  | Y  | Y  | Y  | Y  | N/A | N/A | Y   | 8/8       |
| Luo et al., 2023 <sup>42</sup>                          | N/A | Y  | Y  | Y  | Y  | Y  | Y  | Y  | N/A | N/A | Y   | 8/8       |
| Moretti et al., 2021 <sup>38</sup>                      | N/A | U  | U  | N  | N  | Y  | U  | U  | U   | U   | N   | 1/10      |
| Schnier et al., 2023 <sup>35</sup>                      | N/A | Y  | Y  | Y  | Y  | Y  | Y  | Y  | N/A | N/A | Y   | 8/8       |
| Sizoo et al., 2022 <sup>39</sup>                        | N/A | Y  | Y  | N  | N  | Y  | Y  | U  | Y   | N   | Y   | 6/10      |
| <i>Qualitative research</i> <sup>29</sup>               |     |    |    |    |    |    |    |    |     |     |     |           |
| Richards et al., 2022 <sup>32</sup>                     | U   | Y  | Y  | Y  | Y  | Y  | Y  | Y  | Y   | Y   | -   | 9/10      |

Y, Yes; N, No; U, Unclear; N/A, Not applicable.
