# Supplementary material for: Psychotropic use for behavioral and psychological symptoms of dementia during the COVID-19 pandemic: a systematic review and meta-analysis
Source: PubMed Central journal article supplement — BMC Geriatr. 2024 Nov 21;24:967. doi: 10.1186/s12877-024-05563-4 (PMC11580495; doi:10.1186/s12877-024-05563-4), 2024-11-21
Supplement: 12877_2024_5563_MOESM3_ESM.pdf [file 12877_2024_5563_MOESM3_ESM.pdf]

### Additional file 3. Overview of included studies on changes in psychotropic use for BPSD during the COVID-19 pandemic

| Authors, year, country                             | Methods<br>Design;<br>data sources;<br>comparison periods <sup>†</sup>                                                              | Setting<br>Type;<br>urbanity;<br>number of<br>beds | PwD<br>Sample size;<br>mean age;<br>female %;<br>race/ethnicity;<br>cognitive function;<br>dementia subtype | Measures                                                                                                 | Main relevant findings: Changes in psychotropic use during the pandemic              |                                                                                                      |                                                                                        |                                                         |             | Summary                                                                                                                                                                                                                                                                                |
|----------------------------------------------------|-------------------------------------------------------------------------------------------------------------------------------------|----------------------------------------------------|-------------------------------------------------------------------------------------------------------------|----------------------------------------------------------------------------------------------------------|--------------------------------------------------------------------------------------|------------------------------------------------------------------------------------------------------|----------------------------------------------------------------------------------------|---------------------------------------------------------|-------------|----------------------------------------------------------------------------------------------------------------------------------------------------------------------------------------------------------------------------------------------------------------------------------------|
|                                                    |                                                                                                                                     |                                                    |                                                                                                             |                                                                                                          | Antipsychotics                                                                       | Anxiolytics/<br>Hypnotics<br>(Including BZD)                                                         | Antidepressants                                                                        | Anticonvulsants/<br>Antiepileptics                      | Overall use |                                                                                                                                                                                                                                                                                        |
| <i>Long-term care settings</i>                     |                                                                                                                                     |                                                    |                                                                                                             |                                                                                                          |                                                                                      |                                                                                                      |                                                                                        |                                                         |             |                                                                                                                                                                                                                                                                                        |
| Coe et al., 2023 <sup>31</sup> ;<br>US             | Quantitative repeated cross-sectional; MDS assessments; <u>pre-pandemic</u> : 01/2018–02/2020 vs. <u>pandemic</u> : 03/2020–06/2021 | Over 420 NHs in Michigan; NR; on average 106       | 37,427; 84.1 ± 8.7; 70%; white 81%, black 17%, other 2%; NR; NR                                             | Monthly percentage of residents receiving each medication; slope change (SC) over two periods            | ↑*<br>e.g., 14.2% in Feb 2020 vs. 15.1% in June 2021; SC = 0.07, 95% CI [0.02, 0.12] | ↑***<br>e.g., 16.9% in Feb 2020 vs. 19.1% in June 2021; SC = 0.17, 95% CI [0.13, 0.21] (Anxiolytics) | ↑***<br>e.g., 52.4% in Feb 2020 vs. 58.0% in June 2021; SC = 0.41, 95% CI [0.31, 0.50] | N/A                                                     | N/A         | <ul style="list-style-type: none"> <li>Slope changes comparing pre- and during COVID-19 were significantly positive for the use of antipsychotics, antianxiety drugs, and antidepressants.</li> <li>There was no significant slope change observed in the use of hypnotics.</li> </ul> |
| Ferro Uniguen et al., 2022 <sup>17</sup> ; Spain ‡ | Quantitative repeated cross-sectional; EHR data; <u>pre-pandemic</u> : 04/2018–03/2020 vs. <u>pandemic</u> : 04/2020–03/2021        | Seven NHs in Gipuzkoa; NR; NR                      | 163; 83.9 ± 8.9; 70%; NR; severe dementia (GDS: 6-7) 66%; AD 52%, VaD 6%, LBD 5%                            | Monthly average percentage of residents with prescriptions; absolute difference (AD) between two periods | ↓***<br>80.5% vs. 78.2%; AD = -2.31, 95% CI [-3.68, -0.93]                           | →<br>32.0% vs. 31.9%; AD = -0.28, 95% CI [-2.40, 2.34] (BZD)                                         | ↑***<br>63.4% vs. 71.9%; AD = 8.57, 95% CI [6.89, 10.24]                               | ↑***<br>36.3% vs. 42.4%; AD = 6.10, 95% CI [3.20, 9.00] | N/A         | <ul style="list-style-type: none"> <li>Antipsychotic drug use significantly decreased.</li> <li>The use of benzodiazepines showed no significant change.</li> <li>Antidepressants and antiepileptic drug use increased significantly.</li> </ul>                                       |

Additional file 3. Overview of included studies on changes in psychotropic use for BPSD during the COVID-19 pandemic (continued)

| Authors, year, country                       | Methods<br>Design;<br>data sources;<br>comparison periods <sup>†</sup>                                                                                                                                                      | Setting<br>Type;<br>urbanity;<br>number of<br>beds                                                     | PwD<br>Sample size;<br>mean age;<br>female %;<br>race/ethnicity;<br>cognitive function;<br>dementia subtype | Measures                                             | Main relevant findings: Changes in psychotropic use during the pandemic |                                                                  |                                                            |                                                           |             | Summary                                                                                                                                                                                                                                                                                                                                                   |
|----------------------------------------------|-----------------------------------------------------------------------------------------------------------------------------------------------------------------------------------------------------------------------------|--------------------------------------------------------------------------------------------------------|-------------------------------------------------------------------------------------------------------------|------------------------------------------------------|-------------------------------------------------------------------------|------------------------------------------------------------------|------------------------------------------------------------|-----------------------------------------------------------|-------------|-----------------------------------------------------------------------------------------------------------------------------------------------------------------------------------------------------------------------------------------------------------------------------------------------------------------------------------------------------------|
|                                              |                                                                                                                                                                                                                             |                                                                                                        |                                                                                                             |                                                      | Antipsychotics                                                          | Anxiolytics/<br>Hypnotics<br>(Including BZD)                     | Antidepressants                                            | Anticonvulsants/<br>Antiepileptics                        | Overall use |                                                                                                                                                                                                                                                                                                                                                           |
| <i>Long-term care settings (continued)</i>   |                                                                                                                                                                                                                             |                                                                                                        |                                                                                                             |                                                      |                                                                         |                                                                  |                                                            |                                                           |             |                                                                                                                                                                                                                                                                                                                                                           |
| Hoel et al., 2022 <sup>37</sup> ;<br>Germany | Mixed methods cross-sectional; a follow-up questionnaire formed part of a national online survey involving 417 employees at the managerial level; <u>pre-pandemic</u> : not specified vs. <u>pandemic</u> : 07/2020–02/2021 | 401 NHs nationwide; NR; 86.3 ± 41.2                                                                    | all NR                                                                                                      | One custom-designed item                             | N/A                                                                     | N/A                                                              | N/A                                                        | N/A                                                       | ↑           | • An overall low increase in pharmacological interventions for behavioral symptoms was noted in fewer than six percent (5.6%, n = 344) of the included NHs.                                                                                                                                                                                               |
| Maxwell et al., 2024 <sup>38</sup> ; Canada  | Quantitative population-based, repeated cross-sectional; administrative databases; <u>pre-pandemic</u> : 01/2018–02/2020 vs. <u>pandemic</u> : 03/2020–12/2021                                                              | 256 publicly subsidized AL settings in Alberta; urban 91%; ≤ 50 22%, 51–100 41%, 101–200 27% > 200 10% | 2,874; 82.4 ± 9.8; 68%; NR; moderate/severe impairment 65%; NR                                              | Prevalence ratios (PR) for each medication dispensed | ↑*<br>e.g., PR = 1.22, 95% CI [1.16, 1.28] in Sep–Dec 2021              | ↓*<br>e.g., PR = 0.86, 95% CI [0.78, 0.95] in Jun–Aug 2021 (BZD) | ↑*<br>e.g., PR = 1.09, 95% CI [1.06, 1.13] in Sep–Dec 2021 | →<br>e.g., PR = 1.06, 95% CI [0.96, 1.19] in Sep–Dec 2021 | N/A         | • There has been a significant increase in the use of antipsychotic and antidepressant drugs; antipsychotic use increased to a greater degree than antidepressant use.<br>• Overall, benzodiazepine use decreased significantly.                                                                                                                          |
| McDermid et al., 2023 <sup>34</sup> ; UK     | Quantitative retrospective cohort; prescribing records; <u>pre-pandemic</u> : 2015–2016 vs. <u>pandemic</u> : 04/2021–01/2022                                                                                               | 149 (pre-pandemic) and 69 (pandemic) NHs; NR; NR vs. on average 42                                     | 847 vs. 666; 88.4 ± 8.5 vs. 85.5 ± 8.0; 69% vs. 70%; NR; severe dementia 81% vs. 72%; NR                    | Mean percentage of residents with prescription       | ↑***<br>18% vs. 32%                                                     | N/A                                                              | N/A                                                        | N/A                                                       | N/A         | • There was a significant increase in antipsychotic prescriptions.<br>• In the pre-pandemic sample, all NHs had prescribing rates ranging from six to 32%, with two outliers at 40% and 52%.<br>• In the pandemic sample, the median prescription rates were 7%, 20%, and 59%, across the low, medium, and high antipsychotic use tertiles, respectively. |

Additional file 3. Overview of included studies on changes in psychotropic use for BPSD during the COVID-19 pandemic (continued)

| Authors, year, country                         | Methods<br>Design;<br>data sources;<br>comparison periods <sup>†</sup>                                                                                                                 | Setting<br>Type;<br>urbanity;<br>number of<br>beds | PwD<br>Sample size;<br>mean age;<br>female %;<br>race/ethnicity;<br>cognitive function;<br>dementia subtype                                                                        | Measures                                                | Main relevant findings: Changes in psychotropic use during the pandemic |                                                          |                                                    |                                    |             | Summary                                                                                                                                                                                                                                                       |
|------------------------------------------------|----------------------------------------------------------------------------------------------------------------------------------------------------------------------------------------|----------------------------------------------------|------------------------------------------------------------------------------------------------------------------------------------------------------------------------------------|---------------------------------------------------------|-------------------------------------------------------------------------|----------------------------------------------------------|----------------------------------------------------|------------------------------------|-------------|---------------------------------------------------------------------------------------------------------------------------------------------------------------------------------------------------------------------------------------------------------------|
|                                                |                                                                                                                                                                                        |                                                    |                                                                                                                                                                                    |                                                         | Antipsychotics                                                          | Anxiolytics/<br>Hypnotics<br>(Including BZD)             | Antidepressants                                    | Anticonvulsants/<br>Antiepileptics | Overall use |                                                                                                                                                                                                                                                               |
| <i>Long-term care settings (continued)</i>     |                                                                                                                                                                                        |                                                    |                                                                                                                                                                                    |                                                         |                                                                         |                                                          |                                                    |                                    |             |                                                                                                                                                                                                                                                               |
| Sizoo et al., 2022 <sup>39</sup> , Netherlands | Quantitative longitudinal cohort; data from electronic prescription system; pandemic: 02/2020 vs. 08/2020 (during the gradual easing of restrictions after the first wave of COVID-19) | 19 NHs in Amsterdam; urban; NR                     | 252; 84 ± 9; 71%; NR; mild/moderate dementia (GDS: 1-5) 30%, severe (GDS: 6-7) 70%; AD 41%, VaD 16%, mixed 14%, other 8%, not specified 21%                                        | Monthly point prevalence of residents prescribed        | →<br>e.g., 21.0% in Feb 2020 vs. 22.9% in Aug 2020                      | →<br>e.g., 13.7% in Feb 2020 vs. 13.7% in Aug 2020 (BZD) | →<br>e.g., 24.4% in Feb 2020 vs. 25.4% in Aug 2020 | N/A                                | N/A         | • Throughout the first wave of the pandemic, the use of antipsychotics, benzodiazepines, and antidepressants remained stable over time.                                                                                                                       |
| Wang et al., 2023 <sup>36</sup> , Canada       | Quantitative retrospective cohort; eMARs data; pre-pandemic: 01/2018–05/2019 vs. pandemic: 01/2020–05/2021                                                                             | Two LTC settings; urban; over 300 beds             | 658 vs. 621; 94.4 ± 3.8 vs. 93.9 ± 5.7; 86% vs. 81%; NR; severe dementia 54% vs. 36%; AD 22% vs. 16%, VaD 16% vs. 6%, mixed 11% vs. 9%, other 1% vs. 3%, not specified 51% vs. 66% | Prevalence of residents who received ≥ 1 PRN injections | ↑<br>5.8% vs. 12.1% (haloperidol); 0% vs. 0.3% (Olanzapine)             | ↑<br>2.0% vs. 3.5% (Lorazepam)                           | N/A                                                | N/A                                | N/A         | • The prevalence of patients who received PRN haloperidol, olanzapine, and lorazepam increased from 5.8% to 12.1% and from 0% to 0.3%, from 2.0% to 3.5% respectively.                                                                                        |
| Yan et al., 2023 <sup>33</sup> , US            | Quantitative population-based, repeated cross-sectional; MDS and Medicare claim data; pre-pandemic: 2017Q1–2020Q1 pandemic: 2020Q2–2020Q4                                              | 15,751 NHs; NR; 141.3 ± 88.4                       | 2,787,961; ≥ 85 51; 68%; White 48%, Black 36%, Hispanic 16%; severe impairment 18%; NR                                                                                             | Percentage of any antipsychotic use during a quarter    | ↑ <sup>***</sup><br>23.7% vs. 24.8%                                     | N/A                                                      | N/A                                                | N/A                                | N/A         | • Between 2017Q1 and 2020Q4, antipsychotic use significantly increased across all four race/ethnicity groups, rising from 23.7% to 24.8% (p < .001).<br>• High minority NHs experienced a greater increase in antipsychotic use compared to low-minority NHs. |

Additional file 3. Overview of included studies on changes in psychotropic use for BPSD during the COVID-19 pandemic (continued)

| Authors, year, country                       | Methods<br>Design;<br>data sources;<br>comparison periods <sup>†</sup>                                                                                                                                          | Setting<br>Type;<br>urbanity;<br>number of<br>beds | PwD<br>Sample size;<br>mean age;<br>female %;<br>race/ethnicity;<br>cognitive function;<br>dementia subtype                         | Measures                                                             | Main relevant findings: Changes in psychotropic use during the pandemic                                          |                                              |                 |                                    |             | Summary                                                                                                                                                                                                                                                                         |
|----------------------------------------------|-----------------------------------------------------------------------------------------------------------------------------------------------------------------------------------------------------------------|----------------------------------------------------|-------------------------------------------------------------------------------------------------------------------------------------|----------------------------------------------------------------------|------------------------------------------------------------------------------------------------------------------|----------------------------------------------|-----------------|------------------------------------|-------------|---------------------------------------------------------------------------------------------------------------------------------------------------------------------------------------------------------------------------------------------------------------------------------|
|                                              |                                                                                                                                                                                                                 |                                                    |                                                                                                                                     |                                                                      | Antipsychotics                                                                                                   | Anxiolytics/<br>Hypnotics<br>(Including BZD) | Antidepressants | Anticonvulsants/<br>Antiepileptics | Overall use |                                                                                                                                                                                                                                                                                 |
| <i>Communities</i>                           |                                                                                                                                                                                                                 |                                                    |                                                                                                                                     |                                                                      |                                                                                                                  |                                              |                 |                                    |             |                                                                                                                                                                                                                                                                                 |
| Cohen et al., 2020 <sup>41</sup> , Argentina | Quantitative cross-sectional; a survey among FCGs of patients with dementia living at home; <u>pre-pandemic</u> : not specified vs. <u>pandemic</u> : 03/2020–04/2020                                           | Home; NR; N/A                                      | 119; 81.2 ± 7.0; 65%; NR; mild dementia (CDR 1) 34%, moderate (CDR 2) 32%, severe (CDR 3) 34%; AD 67%, mixed 22%, VaD 6%, others 2% | Questions about whether there was a need to initiate each medication | ↑                                                                                                                | ↑<br>(BZD)<br><br>↑<br>(Hypnotics)           | ↑               | N/A                                | N/A         | <ul style="list-style-type: none"> <li>• FCGs reported an increase in the use of antipsychotics (20.2% of respondents), benzodiazepines (15.1%), antidepressants (10.1%), and hypnotics (6.7%).</li> <li>• This finding was independent of the severity of dementia.</li> </ul> |
| Moretti et al., 2021 <sup>38</sup> , Italy   | Quantitative longitudinal cohort; weekly video-phone survey data obtained by patients and their caregivers; <u>pandemic</u> : 03/2020 vs. 05/2020 and 07/2020 (at the end of the lockdown and two months later) | Home; NR; N/A                                      | 221; 75.6 ± 6.6; 54%; NR; mild/moderate dementia 66%, severe dementia 34%; VaD only                                                 | Percentage of patients prescribed                                    | ↑<br>17% vs. 35%, and then 22%<br>(Typical neuroleptics);<br>24% vs. 49% and then 31%<br>(Atypical neuroleptics) | ↑<br>26% vs. 96% and then 41%<br>(BZD)       | N/A             | N/A                                | N/A         | <ul style="list-style-type: none"> <li>• During the lockdown period, patients reported an increase in the use of both benzodiazepines and typical and atypical neuroleptics.</li> </ul>                                                                                         |

### Additional file 3. Overview of included studies on changes in psychotropic use for BPSD during the COVID-19 pandemic (continued)

| Authors, year, country                                                                           | Methods<br>Design;<br>data sources;<br>comparison periods <sup>†</sup>                                                                                                                                               | Setting<br>Type;<br>urbanity;<br>number of<br>beds  | PwD<br>Sample size;<br>mean age;<br>female %;<br>race/ethnicity;<br>cognitive function;<br>dementia subtype                                                | Measures                                                                                                                               | Main relevant findings: Changes in psychotropic use during the pandemic |                                              |                 |                                    |             | Summary                                                                                                                                                                                     |
|--------------------------------------------------------------------------------------------------|----------------------------------------------------------------------------------------------------------------------------------------------------------------------------------------------------------------------|-----------------------------------------------------|------------------------------------------------------------------------------------------------------------------------------------------------------------|----------------------------------------------------------------------------------------------------------------------------------------|-------------------------------------------------------------------------|----------------------------------------------|-----------------|------------------------------------|-------------|---------------------------------------------------------------------------------------------------------------------------------------------------------------------------------------------|
|                                                                                                  |                                                                                                                                                                                                                      |                                                     |                                                                                                                                                            |                                                                                                                                        | Antipsychotics                                                          | Anxiolytics/<br>Hypnotics<br>(Including BZD) | Antidepressants | Anticonvulsants/<br>Antiepileptics | Overall use |                                                                                                                                                                                             |
| <i>Mixtures</i>                                                                                  |                                                                                                                                                                                                                      |                                                     |                                                                                                                                                            |                                                                                                                                        |                                                                         |                                              |                 |                                    |             |                                                                                                                                                                                             |
| Harding et al., 2023 <sup>20</sup> ; UK                                                          | Mixed methods cross-sectional; a survey to 24 people with dementia and 184 caregivers living in care homes or communities; <u>pre-pandemic</u> : not specified vs. <u>pandemic</u> : not specified (08/2020–09/2020) | A mixture of care homes and communities; NR; NR     | 208; NR; NR; NR; NR; young onset, non-memory-led and inherited dementias such as posterior cortical atrophy (PCA), primary progressive aphasia (PPA), etc. | Questions about whether there were changes to medication as a consequence of the lockdown                                              | N/A                                                                     | N/A                                          | N/A             | N/A                                | ↑           | • Overall, people with dementia and caregivers reported changes to medication (26%) during lockdown.                                                                                        |
| Harrison et al., 2021 <sup>41</sup> ; multinational (predominately US)                           | Quantitative retrospective cohort; TriNetX <sup>8</sup> ; <u>pre-pandemic</u> : 01/2019–12/2019 vs. <u>pandemic</u> : 01/2020–12/2020                                                                                | A mixture of hospitals, primary care, etc.; NR; N/A | 27,050 vs 31,963; 80.7 ± 7.5 vs. 80.7 ± 7.3; 58% vs. 56%; white 76% vs. 74%; black 12% vs. 15%; NR; 75% had more than one type                             | Proportion of individuals receiving medications                                                                                        | ↑ <sup>***</sup><br>14.7% vs. 16.4%                                     | N/A                                          | N/A             | N/A                                | N/A         | • There was a significant higher proportion of PwD receiving antipsychotics compared to the pre-pandemic period.                                                                            |
| Luo et al., 2023 <sup>42</sup> ; multinational (France, Germany, Italy, South Korea, UK, and US) | Quantitative population-based retrospective cohort; EHR and claims data from 8 databases in six countries; <u>pre-pandemic</u> : 01/2016–02/2020 vs. <u>pandemic</u> : 04/2020–2021                                  | A mixture of hospitals, primary care, etc.; NR; N/A | 857,238; ≥ 65; 58%; NR; NR; NR                                                                                                                             | Prevalence of patients being prescribed by year and month; rate ratios (RR) for prescribing rates compared with the same month in 2019 | ↑ <sup>*</sup>                                                          | N/A                                          | N/A             | N/A                                | N/A         | • The prescribing rates of antipsychotics increased in 2020 and remained high in 2021 in six databases representing all countries: France, Germany, Italy, South Korea, the UK, and the US. |

### Additional file 3. Overview of included studies on changes in psychotropic use for BPSD during the COVID-19 pandemic (continued)

| Authors, year, country                   | Methods<br>Design;<br>data sources;<br>comparison periods <sup>†</sup>                                                                                                                                                                    | Setting<br>Type;<br>urbanity;<br>number of<br>beds        | PwD<br>Sample size;<br>mean age;<br>female %;<br>race/ethnicity;<br>cognitive function;<br>dementia subtype | Measures                                         | Main relevant findings: Changes in psychotropic use during the pandemic |                                              |                 |                                    |             | Summary                                                                                                                                                                                                                                                                                                              |
|------------------------------------------|-------------------------------------------------------------------------------------------------------------------------------------------------------------------------------------------------------------------------------------------|-----------------------------------------------------------|-------------------------------------------------------------------------------------------------------------|--------------------------------------------------|-------------------------------------------------------------------------|----------------------------------------------|-----------------|------------------------------------|-------------|----------------------------------------------------------------------------------------------------------------------------------------------------------------------------------------------------------------------------------------------------------------------------------------------------------------------|
|                                          |                                                                                                                                                                                                                                           |                                                           |                                                                                                             |                                                  | Antipsychotics                                                          | Anxiolytics/<br>Hypnotics<br>(Including BZD) | Antidepressants | Anticonvulsants/<br>Antiepileptics | Overall use |                                                                                                                                                                                                                                                                                                                      |
| <i>Mixtures (continued)</i>              |                                                                                                                                                                                                                                           |                                                           |                                                                                                             |                                                  |                                                                         |                                              |                 |                                    |             |                                                                                                                                                                                                                                                                                                                      |
| Richards et al., 2022 <sup>32</sup> ; US | Qualitative; interviews with 4 FCGs and 3 NPs caring for people with dementia living in NHs, and 7 FCGs of people with dementia living at home; <u>pre-pandemic</u> : not specified vs. <u>pandemic</u> : not specified (10/2020–05/2021) | A mixture of NHs and communities; NR; N/A                 | all NR                                                                                                      | Semi-structured interview                        | N/A                                                                     | ↑<br>(Hypnotics)                             | N/A             | N/A                                | N/A         | • Both of caregivers living in NHs and communities reported increased sleep medication use to manage worsened sleep disturbances and nighttime agitations.                                                                                                                                                           |
| Schnier et al., 2023 <sup>35</sup> ; UK  | Quantitative population-based retrospective cohort; EHR data from Welsh databank; <u>pre-pandemic</u> : 01/2016–02/2020 vs. <u>pandemic</u> : 03/2020–08/2021                                                                             | A mixture of primary care and care homes (14.4%); NR; N/A | 57,396; median 82; 61%; NR; AD 44%, VaD 31%, LBD 2%, FTD 1%, not specified 31%                              | Number of prescriptions per 10,000 person-months | ↑<br>(Overall, Risperidone, Olanzapine)<br>↓<br>(Quetiapine)            | ↓<br>(BZD)                                   | N/A             | N/A                                | N/A         | • Antipsychotic drug use increased throughout 2020, with the absolute change being relatively small, ranging from 1,253 prescriptions per 10,000 person-months in March 2019 to 1,305 in September 2020.<br>• There was a downward trend in benzodiazepine use from the pre-pandemic period and the pandemic period. |

AD, Alzheimer's disease; AL, assisted living; BZD, Benzodiazepine; CDR, Clinical Dementia Rating; CI, confidence interval; EHR, electronic health records; EMR, electronic medical records; eMARs, electronic medication administration records; FCG, family care giver; FTD, frontotemporal dementia; GDS, Global Deterioration Scale; LBD, Lewy body dementia; MDS, Minimum Data Set; N/A, not applicable; NH, nursing home; NP, nurse practitioner; NR, not reported; PRN, Pro Re Nata (as necessary); PwD, people with dementia; VaD, vascular dementia.

<sup>†</sup> We presented the data collection period in parentheses if the comparison period was not specified.

<sup>‡</sup> We included data from psychogeriatric units, where 90% of residents had dementia, because more than half of the residents in geriatric units did not have dementia.

<sup>§</sup> TriNetX is a global federated health research network, providing access to statistics on EMR from participating healthcare organizations, predominately in the US.

\* $p < .05$ . \*\* $p < .01$ . \*\*\* $p < .001$
