# Supplementary material for: Psychotropic use for behavioral and psychological symptoms of dementia during the COVID-19 pandemic: a systematic review and meta-analysis
Source: PubMed Central journal article supplement — BMC Geriatr. 2024 Nov 21;24:967. doi: 10.1186/s12877-024-05563-4 (PMC11580495; doi:10.1186/s12877-024-05563-4), 2024-11-21
Supplement: 12877_2024_5563_MOESM5_ESM.pdf [file 12877_2024_5563_MOESM5_ESM.pdf]

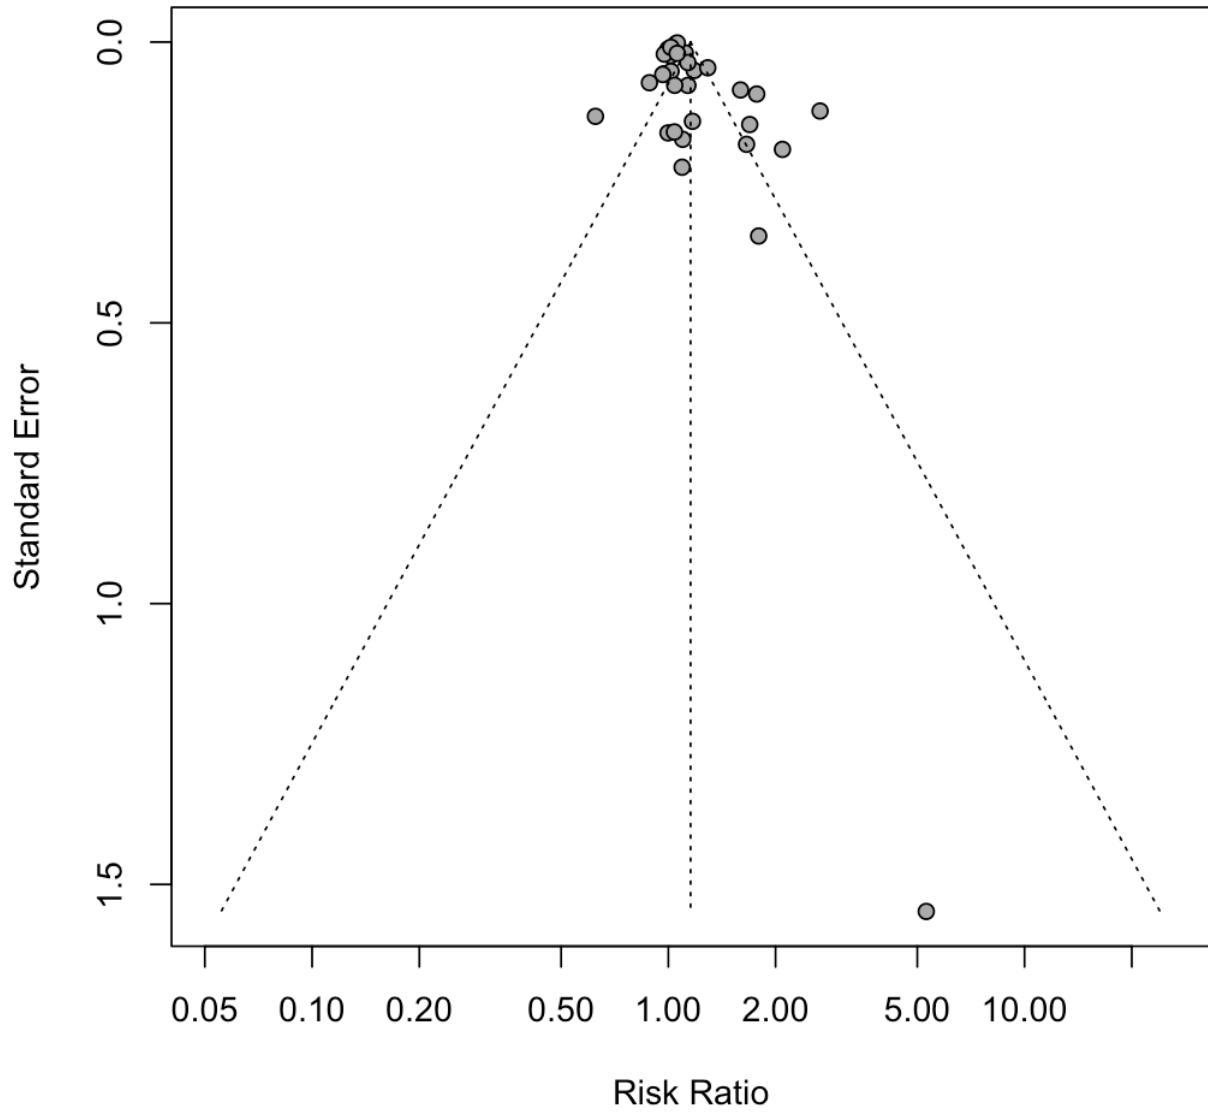

Additional file 5. Funnel plot of risk ratios and standard errors among the studies included in meta-analysis
